# Supplementary material for: Diversity of turf-forming Gelidium species growing on subtidal crustose coralline algae in the East Sea of Korea with a description of G. cristatum sp. nov.
Source: publisher site journal article supplement (doi:10.1515/bot-2025-0008), 2025-08-11
Supplement: Supplementary file 1 [file j_bot-2025-0008_suppl_001.docx]

Supplementary Material

Diversity of turf-forming *Gelidium* species growing on subtidal crustose coralline algae in the East Sea of Korea with a description of *G. cristatum* sp. nov.

Seungyeop Hanet al.

DOI 10.1515/bot-2025-0008

**Supplementary Table S1:** List of specimens and voucher information for *rbc*L sequences newly analyzed in this study.

| **Species** | **Voucher** | **Collected site** | **Collected date** | **GenBank accession no.** |
| --- | --- | --- | --- | --- |
| ***Gelidium cristatum* sp. nov.** | **2303B02** | **Samjeong, Pohang, Korea** | **16 Mar. 2023** | **PQ435909** |
|  | **2305B04** | **Samjeong, Pohang, Korea** | **11 May 2023** | **PQ435910** |
|  | **2305DD03** | **Haenyeobawi, Dokdo, Korea** | **26 May 2023** | **PQ435911** |
|  | **2305DD05** | **Haenyeobawi, Dokdo, Korea** | **26 May 2023** | **PQ435912** |
|  | **2305GE02** | **Gwaneumdo, Ullengdo, Korea** | **27 May 2023** | **PQ435913** |
|  | **2305GE05** | **Gwaneumdo, Ullengdo, Korea** | **27 May 2023** | **PQ435914** |
|  | **2305S23** | **Samjeong, Pohang, Korea** | **11 May 2023** | **PQ435915** |
|  | **2305S24** | **Samjeong, Pohang, Korea** | **11 May 2023** | **PQ435916** |
|  | **2306S02** | **Samjeong, Pohang, Korea** | **17 Jun. 2023** | **PQ435917** |
|  | **2306S04** | **Samjeong, Pohang, Korea** | **17 Jun. 2023** | **PQ435918** |
|  | **2306S06** | **Samjeong, Pohang, Korea** | **17 Jun. 2023** | **PQ435919** |
|  | **2307B09** | **Samjeong, Pohang, Korea** | **12 Jul. 2023** | **PQ435920** |
|  | **2307B12** | **Samjeong, Pohang, Korea** | **12 Jul. 2023** | **PQ435921** |
|  | **2308.057** | **Samjeong, Pohang, Korea** | **04 Aug. 2023** | **PQ435922** |
|  | **2308U01** | **Geobukbawi, Ullengdo, Korea** | **21 Aug. 2023** | **PQ435923** |
|  | **2308U02** | **Geobukbawi, Ullengdo, Korea** | **21 Aug. 2023** | **PQ435924** |
|  | **2308U04** | **Geobukbawi, Ullengdo, Korea** | **21 Aug. 2023** | **PQ435925** |
|  | **2308U05** | **Geobukbawi, Ullengdo, Korea** | **21 Aug. 2023** | **PQ435926** |
|  | **2308.058** | **Geobukbawi, Ullengdo, Korea** | **21 Aug. 2023** | **PQ435927** |
|  | **2309B05** | **Samjeong, Pohang, Korea** | **04 Sep. 2023** | **PQ435928** |
|  | **2309B14** | **Samjeong, Pohang, Korea** | **04 Sep. 2023** | **PQ435929** |
|  | **2310B03** | **Samjeong, Pohang, Korea** | **04 Oct. 2023** | **PQ435930** |
|  | **2310B05** | **Samjeong, Pohang, Korea** | **04 Oct. 2023** | **PQ435931** |
|  | **2312S05** | **Samjeong, Pohang, Korea** | **27 Dec. 2023** | **PQ435932** |
|  | **2312S08** | **Samjeong, Pohang, Korea** | **27 Dec. 2023** | **PQ435933** |
|  | **2312S10** | **Samjeong, Pohang, Korea** | **27 Dec. 2023** | **PQ435934** |
|  | **2312S11** | **Samjeong, Pohang, Korea** | **27 Dec. 2023** | **PQ435935** |
|  | **2312S14** | **Samjeong, Pohang, Korea** | **27 Dec. 2023** | **PQ435936** |
| *Gelidium* sp. 1 | 2305S19 | Samjeong, Pohang, Korea | 11 May 2023 | PQ435937 |
|  | 2307B07 | Samjeong, Pohang, Korea | 12 Jul. 2023 | PQ435938 |
|  | 2307B08 | Samjeong, Pohang, Korea | 12 Jul. 2023 | PQ435939 |
|  | 2308B02 | Samjeong, Pohang, Korea | 04 Aug. 2023 | PQ435940 |
|  | 2308B04 | Samjeong, Pohang, Korea | 04 Aug. 2023 | PQ435941 |
|  | 2308B05 | Samjeong, Pohang, Korea | 04 Aug. 2023 | PQ435942 |
|  | 2309B02 | Samjeong, Pohang, Korea | 04 Sep. 2023 | PQ435943 |
|  | 2309B03 | Samjeong, Pohang, Korea | 04 Sep. 2023 | PQ435944 |

| **Supplementary Table S1, continued** |  |  |  |  |
| --- | --- | --- | --- | --- |
| **Species** | **Voucher** | **Collected site** | **Collected date** | **GenBank accession no.** |
| *Gelidium* sp. 2 | 2309B08 | Samjeong, Pohang, Korea | 27 Dec. 2023 | PQ435945 |
| *Gelidium elegans* Kützing | 2303S20 | Samjeong, Pohang, Korea | 16 Mar. 2023 | PQ435946 |
|  | 2303S34 | Samjeong, Pohang, Korea | 16 Mar. 2023 | PQ435947 |
| *Gelidium eucorneum* K.M. Kim, I.K. Hwang, J.K. Park *et* S.M. Boo | 2303B04 | Samjeong, Pohang, Korea | 16 Mar. 2023 | PQ435948 |
| 2304S14 | Samjeong, Pohang, Korea | 12 Apr. 2023 | PQ435949 |
|  | 2305S01 | Samjeong, Pohang, Korea | 11 May 2023 | PQ435950 |
| 2305S02 | Samjeong, Pohang, Korea | 11 May 2023 | PQ435951 |
| 2305S22 | Samjeong, Pohang, Korea | 11 May 2023 | PQ435952 |
| 2306S01 | Samjeong, Pohang, Korea | 17 Jun. 2023 | PQ435953 |
| 2307B06 | Samjeong, Pohang, Korea | 12 Jul. 2023 | PQ435954 |
| 2310.022a | Samjeong, Pohang, Korea | 04 Oct. 2023 | PQ435955 |
| 2312S02 | Samjeong, Pohang, Korea | 27 Dec. 2023 | PQ435956 |
|  | 2312S03 | Samjeong, Pohang, Korea | 27 Dec. 2023 | PQ435957 |
|  | 2312S04 | Samjeong, Pohang, Korea | 27 Dec. 2023 | PQ435958 |
|  | 2312S06 | Samjeong, Pohang, Korea | 27 Dec. 2023 | PQ435959 |
|  | 2312S09 | Samjeong, Pohang, Korea | 27 Dec. 2023 | PQ435960 |
|  | 2312S12 | Samjeong, Pohang, Korea | 27 Dec. 2023 | PQ435961 |
|  | 2312S13 | Samjeong, Pohang, Korea | 27 Dec. 2023 | PQ435962 |
|  | 2312S15 | Samjeong, Pohang, Korea | 27 Dec. 2023 | PQ435963 |
| *Gelidium rosulatum* G.H. Boo, J.K. Park, K.S. Han *et* H.S. Yoon | 2303B08 | Samjeong, Pohang, Korea | 16 Mar. 2023 | PQ435964 |
|  | 2305B02 | Samjeong, Pohang, Korea | 11 May 2023 | PQ435965 |
|  | 2305B03 | Samjeong, Pohang, Korea | 11 May 2023 | PQ435966 |
|  | 2305S12 | Samjeong, Pohang, Korea | 11 May 2023 | PQ435967 |
|  | 2308B06 | Samjeong, Pohang, Korea | 04 Aug. 2023 | PQ435968 |
|  | 2309B01 | Samjeong, Pohang, Korea | 27 Dec. 2023 | PQ435969 |
|  | 2309B04 | Samjeong, Pohang, Korea | 27 Dec. 2023 | PQ435970 |
|  | 2310B06 | Samjeong, Pohang, Korea | 04 Oct. 2023 | PQ435971 |
|  | 2310.026 | Samjeong, Pohang, Korea | 04 Oct. 2023 | PQ435972 |
|  | 2310.028 | Samjeong, Pohang, Korea | 04 Oct. 2023 | PQ435973 |

Bold indicates a new species described in this study.

**Supplementary Table S2:** List of specimens used in the maximum likelihood tree based on combined data for three genes.

| **Species** | **Voucher** | **Collection information** | ***rbc*L** | ***cox*1** | ***psa*A** | **References** |
| --- | --- | --- | --- | --- | --- | --- |
| ***Gelidium cristatum* sp. nov.** | 2303B02 | Samjeong, Pohang, Korea; 16 Mar. 2023 | PQ435909 | PQ435981 | PQ435974 | This study |
|  | 2305B04 | Samjeong, Pohang, Korea; 11 May. 2023 | PQ435910 | PQ435982 | - | This study |
|  | 2308.057 | Samjeong, Pohang, Korea; 04 Aug. 2023 | PQ435935 | - | PQ435975 | This study |
|  | 2308.058 | Geobukbawi, Ullengdo, Korea; 21 Aug. 2023 | PQ435936 | - | PQ435976 | This study |
| *G. eucorneum* K.M. Kim, I.K. Hwang, J.K. Park *et* S.M. Boo | 2305S01 | Samjeong, Pohang, Korea; 11 May. 2023 | PQ435948 | PQ435983 | PQ435977 | This study |
| 2305S02 | Samjeong, Pohang, Korea; 11 May. 2023 | PQ435949 | PQ435984 | PQ435978 | This study |
| 2312S13 | Samjeong, Pohang, Korea; 27 Dec. 2023 | PQ435960 | PQ435985 | PQ435979 | This study |
|  | G6112 | Hakdong, Geoje, Korea | HM629815 | HM629854 | HM629894 | Kim et al. 2011a |
| *G. rosulatum* G.H. Boo, J.K. Park, K.S. Han *et* H.S. Yoon | 2305B02 | Samjeong, Pohang, Korea; 11 May. 2023 | PQ435965 | PQ435986 | PQ435980 | This study |
| 2305B03 | Samjeong, Pohang, Korea; 11 May. 2023 | PQ435966 | PQ435987 | - | This study |
|  | GHB00520 | Gajebawi Rock, Ulleungdo, KOrea; 13 May 2017 | OK665782 | OK665775 | - | Boo et al. 2022b |
| *G. adriaticum* C. Perrone, A. Bottalico, G.H. Boo *et* S.M. Boo | BAGR2591 | Torre a Mare, Bari, Apulia, Italy; 25 Sep. 2012 | KU958475 | KU958469 | - | Perrone et al. 2019 |
| *G. asperum* (C.Agardh) Greville | CNU037655 | Nora creina Bay, Australia |  | JX891567 | KT920287 | Boo et al. 2013/  Boo et al. 2016b |
| *G. australe* J. Agardh | GausPtMac-2 | Port McDonnell, South Australia, Australia | AY350783 | KT920391 | KT920288 | Boo et al. 2016b |
| *G. bernabei* A.J.K. Millar *et* D.W. Freshwater | NSW-5 | Gordons Bay, Clovelly, NSW, Australia | AY352419 | KT920392 | KT920289 | Boo et al. 2016b |
| *G. brasiliense* Brunelli, Boo *et* M.T. Fujii | SP470211 | Espirito Santo, Castelhanos, Brazil; 04 Oct. 2017 | MH538512 | MH538513 |  | Brunelli et al. 2019 |
| *G. capense* (S.G.Gmelin) P.C. Silva | G3597 | Clovelly, Western Cape Prov., South Africa | HM629818 | HM629858 | HM629898 | Kim et al. 2011a |
| *G. carolinianum* Perrone, Freshwater, Bottalico, G.H. Boo *et* S.M. Boo | BAGR12109 | Torre a Mare, Bari, Apulia, Italy; 12 Oct. 2011 | KU564068 | KU564063 |  | Perrone et al. 2019 |
| *G. coreanum* K.M. Kim, I.K. Hwang, H.S. Yoon *et* S.M. Boo | CNU000127 | Youngjin, Gangneung, Korea | JQ340391 | JQ340419 | KT920290 | Kim et al. 2012/  Boo et al. 2016b |
| *G. corneum* (Hudson) J.V. Lamouroux | G2483 | Morocco; Nov. 2005 | HM629821 | HM629861 | HM629901 | Kim et al. 2011a |
| *G. coulteri* Harvey | G2632 | Agate Beach, California, USA | HM629822 | HM629862 | HM629902 | Kim et al. 2011a |
| *G. crinale* (Hare ex Turner) Gaillon | G2656 | Muchangpo, Boryeong, Korea | HM629823 | HM629863 | HM629903 | Kim et al. 2011a |
| *G. crinale* subsp. *longipes* (J. Agardh) W.A. Nelson *et* G.H. Boo | ASD265 | Tapeka Point, North Is., New Zealand; 29 Oct. 2003 | KF381387 | KF381378 | - | Boo et al. 2014 |
| *G. crispum* M. Howe | CNU018556 | Playa Horninos, Huaura, Peru | KT920269 | KT920393 | KT920292 | Boo et al. 2016b |
| *G. declerckii* Tronchin | S14 | Nahoon Point, Eastern Cape Prov., South Africa | AY350775 | KT920394 | KT920293 | Boo et al. 2016b |
| *G. elegans* Kützing | G2886 | Seogeochado, Jindo, Korea | HM629829 | HM629869 | HM629909 | Kim et al. 2011a |
| *G. floridanum* W.R. Taylor | SP468853 | Isla Margarita, Venezuela; 03 May 2015 | MF565758 | MF577000 | - | Brunelli et al. 2019 |
| *G. gabrielsonii* Hughey *et* G.H. Boo | UC2050580 | Hopkins Marine Station, CA, USA; 08 Jun. 2017 | NC_040156 | NC_040155 | NC_040156 | Boo et al. 2019 |
| *G. galapagense* W.R. Taylor | UC1884224 | Isla Isabela, Galapagos Islands; 13 Jan. 1934 | NC_041174 | NC_031837 | NC_041174 | Boo et al. 2019 |
| *G. gonzalezii* D. Rodríguez, Quiroz-González *et* Ponce-Márquez | PTM 10840 | Guerrero, Troncones, Mexico | MN336345 | MN336344 | - | Rodriguez 2020 |
| *G. guimaraesiae* Brunelli, Milstein, Boo *et* M.T. Fujii | SP469177 | Espirito Santo, Capuba Beach, Brazil; 21 Jun.2013 | MF565763 | MF577008 | - | Brunelli et al. 2019 |
|  |  |  |  |  |  |  |
| **Supplementary Table S2, continued** |  |  |  |  |  |  |
| **Species** | **Voucher** | **Collection information** | ***rbc*L** | ***cox*1** | ***psa*A** | **References** |
| *G. indonesianum* K.M. Kim, G.S. Gerung *et* S.M. Boo | CNU024717  (=G2718) | Java Island, Indonesia | JF330216 | JF330200 | KT920295 | Kim et al. 2011b/  Boo et al. 2016b |
| *G. isabelae* W.R. Taylor | CNU025573 | Torregorda, Cadiz, Spain | KT920270 | KT920395 | KT920296 | Boo et al. 2016b |
| *G. japonicum* (Harvey) Okamura | G2190 | Choshi, Chiba, Japan | HM629830 | HM629870 | HM629910 | Kim et al. 2011a |
| *G. jejuense* K.M. Kim, I.K. Hwang, H.S. Yoon *et* S.M. Boo | CNU011862 | Jongdal, Jeju, Korea | JQ340406 | JQ340445 | KT920297 | Kim et al. 2012/  Boo et al. 2016b |
| *G. johnstonii* Setchell *et* N.L. Gardner | CNU002155 | Munseom, Jeju, Korea | KF381386 | KF384128 | KT920298 | Boo et al. 2014 |
| *G. kathyanniae* G.H. Boo *et* Hughey | UC2050581 | China Rock, Pebble Beach, CA, USA; 23 Jul. 2017 | NC_040158 | NC_040157 | NC_040158 | Boo et al. 2019 |
| *G. leptum* G.H. Boo, L. Le Gall, *et* H.S. Yoon | PC0171748 | Baie des Galions, Madagascar; 15 May. 2010 | OP137188 | OP137177 | - | Boo et al. 2022a |
| *G. lineare* Iha *et* Freshwater | SPF57727 | Espirito Santo, Praia dos, Brazil; 05 May 2012 | KT208118 | KT208030 | - | Iha et al. 2015 |
| *G. microdon* Kützing | CNU025583 | Tarifa, Cadiz, Spain | KT920271 | KT920396 | KT920299 | Boo et al. 2016b |
| *G. microglossum* A.L. Grusz *et* Freshwater | WNC20957 | Playa Brasilito, Guanacaste, Costa Rica | KC192649 | KC288160 | - | Grusz & Freshwater 2014 |
| *G. millarianum* G.H. Boo, Hughey, K.A. Miller *et* S.M. Boo | NSW614432 | New South Wales, Lord Howe Island, Neds Beach, Australia; 01 Oct. 2002 | MK497732 | MK497730 | - | Freshwater &  Shahnaz 2019 |
| *G. minimum* K.M. Kim, I.K. Hwang, H.S. Yoon *et* S.M. Boo | CNU000929 | Beomsum, Jeju, Korea | JQ340408 | JQ340449 | - | Kim et al. 2012 |
| *G. nayaritense* D. Rodríguez, Quiroz-González *et* Ponce-Márquez | PTM10875 | Nayarit, Sayulita, Mexico | MT798865 | MT799807 |  | Quiroz- González et al. 2021 |
| *G. nudifrons* N.L. Gardner | CNU026192 | San Clemente Island, USA | KT920272 | KT920398 | KT920300 | Boo et al. 2016b |
| *G. omanense* M.J. Wynne | CNU000130 | Raaha Bay, Dhofar, Oman | - | JX891569 | KT920301 | Boo et al. 2013/  Boo et al. 2016b |
| *G. pacificum* Okamura | G2197 | Marine station, Chiba, Japan; 28 Jul. 2002 | HM629831 | HM629871 | HM629911 | Kim et al. 2011a |
| *G. pakistanicum* (Afaq-Husain *et* Shameel) Shahnaz *et* Freshwater | WNC22843 | Karachi, Paradise Point, Pakistan: 20 Dec. 2014 | MK497735 | MK497727 | - | Freshwater &  Shahnaz 2019 |
| *G. palmatum* G.H. Boo *et* K.M. Kim | CNU059010 | Donggori, Wando, Korea; 14 Jul. 2014 | MN784150 | MN784140 | - | Boo et al. 2020 |
| *G. pristoides* (Turner) Kützing | G3598 | Dalebrook, False Bay, South Africa; 11 May 1992 | HM629834 | HM629874 | HM629914 | Kim et al. 2011a |
| *G. prostratum* K.M. Kim, I.K. Hwang, H.S. Yoon *et* S.M. Boo | CNU011878 | Euihang, Taean, Korea | - | JQ340456 | KT920302 | Kim et al. 2012/  Boo et al. 2016b |
| *G. purpurascens* N.L. Gardner | G2627 | Agate Beach, CA, USA | HM629833 | HM629873 | HM629913 | Kim et al. 2011a |
| *G. pusillum* (Stackhouse) Le Jolis | G3579 | Lion sur-mer, Caen, France; 17 Nov. 2009 | HM629832 | HM629872 | HM629912 | Kim et al. 2011a |
| *G. rex* Santelices *et* I.A. Abbott | G3599 | Punta Lengua de Vaca, Tongoy Bay, Coquimbo, Chile | HM629835 | HM629875 | HM629915 | Kim et al. 2011a |
| *G. robustum* (N.L. Gardner) Hollenberg *et* I.A. Abbott | G4750 | Natividad island, B.C.S, Mexico; 06 May 2009 | HM629836 | HM629876 | HM629916 | Kim et al. 2011a |
| *G. sanyaense* G.C. Wang *et* X.l. Wang | SY28-1 | Xiaodonghai, Sanya, Hainan, China;15 Mar. 2015 | KY494668 | KY494655 | - | Wang et al. 2018 |
| *G. sclerophyllum* W.R.Taylor | WNC20891 | Montezuma, Guanacaste, Costa Rica | KC192651 | KC288159 | - | Grusz & Freshwater 2014 |
| *G. sentosaense* G.H. Boo, Y. Cai *et* S.M. Boo | CNU031026 | Sentosa Island, Singapore | KU512790 | KU512774 | - | Boo et al. 2016a |
| *G. spinosum* (S.G.Gmelin) P.C. Silva | G2449 | Muros, A Coruna, Spain; 30 Jul. 2007 | HM629837 | HM629877 | HM629917 | Kim et al. 2011a |
| *G. usmanghanii* Afaq-Husain *et* M. Shameel | PC0166570 | Sud de la baie, Lokaro, Madagascar; 12 May. 2010 | OP137194 | OP137187 | - | Boo et al. 2022a |
|  |  |  |  |  |  |  |
| **Supplementary Table S2, continued** |  |  |  |  |  |  |
| **Species** | **Voucher** | **Collection information** | ***rbc*L** | ***cox*1** | ***psa*A** | **References** |
| *G. vagum* Okamura | G2918 | Heuksando, Shinan, Korea | HM629840 | HM629880 | HM629920 | Kim et al. 2011a |
| *G. yangmeikengense* G.C. Wang *et* X.L. Wang | SZ14-1 | Yangmeikeng, Guangdong, China;20 Apr. 2015 | KY494683 | KY494664 | - | Wang et al. 2018 |
| *G. yoshidae* G.H. Boo *et* R. Terada | Terada4933 | Aoshima, Miyazaki, Japan | KT920267 | KT920388 | - | Boo et al. 2016b |
| *G. honghaiwanense* G.C. Wang *et* X.l. Wang | SW6-1 | Honghaiwan, Shanwei, China; Apr. 2015 | KY437737 | KY437752 |  | Wang et al. 2017 |
| *Ptilophora scalaramosa* (Kraft) R.E. Norris | CEB001053 | Bulusan, Sorsogon Province, Luzon, Philippines | KT920275 | KT920401 | KT920309 | Boo et al. 2016b |
| *Ptilophora prolifera* (Harvey) J. Agardh | CNU024609 | Penguin, South Australia, Australia | KT920273 | KT920399 | KT920307 | Boo et al. 2016b |
| *Gelidiorariphycus sungminbooi* Iha, Freshwater *et* M.C. Oliveira | IBC0520 | Forno Beach, Arraial do Cabo, Rio de Janeiro, Brazil; 28 Sep. 2011 | KT208112 | KT208023 | MZ835313 | Iha et al. 2015/ Iha et al. 2022 |
| *Gelidiorariphycus loratus* Iha, S.M. Guimarães, Freshwater *et* M.C. Oliveira | IBT0325 | Picinguaba beach, Ubatuba, São Paulo, Brazil; 17 Mar. 2010 | KT208108 | KT208019 | MZ835301 | Iha et al. 2015/ Iha et al. 2022 |

Dash (-) indicates not applicable.

**Supplementary Figure S1:** Four collection sites in the East Sea of Korea. Species names below collection sites indicate the species found at each collection site. Numbers in parentheses indicate the number of specimens.

**Supplementary references**

Boo, G.H. and Hughey, J.R. (2019). Phylogenomics and multigene phylogenies decipher two new cryptic marine algae from California, *Gelidium gabrielsonii* and *G. kathyanniae* (Gelidiales, Rhodophyta). *J. Phycol.* 55: 160-172.

Boo, G.H. and Kim, K.M. (2020). A new species of marine algae from Korea based on morphology and molecular data: *Gelidium palmatum* sp. nov. (Gelidiales, Rhodophyta). *Algae*35: 33-43.

Boo, G.H., Park, J.K., and Boo, S.M. (2013). *Gelidiophycus* (Rhodophyta: Gelidiales): a new genus of marine algae from East Asia. *Taxon* 62: 1105–1116.

Boo, G.H., Kim, K.M., Nelson, W.A., Riosmena-Rodríguez, R., Yoon, K.J. and Boo, S.M. (2014). Taxonomy and distribution of selected species of the agarophyte genus *Gelidium* (Gelidiales, Rhodophyta). *J. Phycol.* 26: 1243–1251.

Boo, G.H., Cai, Y. and Boo, S.M. (2016a). Molecular identification of gelidioid algae (Gelidiales, Rhodophyta) from Singapore with a description of *Gelidium sentosaense* sp. nov. *Phycologia* 55: 247-256.

Boo, G.H., Le Gall, L., Miller, K.A., Freshwater, D.W., Wernberg, T., Terada, R., Yoon, K.J., and Boo, S.M. (2016b). A novel phylogeny of the Gelidiales (Rhodophyta) based on five genes including the nuclear *Ces*A, with descriptions of *Orthogonacladia* gen. nov. and Orthogonacladiaceae fam. nov. *Mol. Phylogenet. Evol.* 101: 359–372.

Boo, G.H., Le Gall, L., Hwang, I.K., Rousseau, F., and Yoon, H.S. (2022a). Species diversity of *Gelidium* from southern Madagascar evaluated by an integrative taxonomic approach. *Diversity* 14: 826.

Boo, G.H., Park, J.K., Han, K.S., and Yoon, H.S. (2022b). *Gelidium rosulatum* (Gelidiales, Rhodophyta), a new species of subtidal marine algae from Korea. *Phycologia* 61: 332–340.

Brunelli, B., Jamas, M., Milstein, D., Boo, S.M., and Fujii, M.T. (2019). *Gelidium brasiliense* sp. nov. (Gelidiales, Rho­dophyta): a diminutive agarophyte from Brazil. *J. Appl. Phycol.* 31: 951–958.

Freshwater D.W. and Shahnaz L. (2019). Phylogenetic relationships of Pakistan *Gelidium* (Gelidiales, Rhodophyta) species with recognition of *Gelidium pakistanicum* stat. nov. *Bot. Mar.* 62: 141–147.

Grusz, A.L. and Freshwater, D.W. (2014). Studies of Costa Rican Gelidiales (Florideophyceae). II. Two Pacific taxa including *Gelidium microglossum*, n. sp. 1. *Pacific Science* 68: 97–110.

Iha, C., Milstein, D., Guimaraes, S.M.P., Freshwater, D.W., and Oliveira, M.C. (2015). DNA barcoding reveals high diversity in the Gelidiales of the Brazilian southeast coast. *Bot. Mar.* 58: 295–305.

Iha, C., Freshwater, D.W., Guimaraes, S.M.P., and Oliveira, M.C. (2022). *Gelidiorariphycus* gen. nov. (Gelidiales, Rhodophyta): a rare genus found in the Americas. *Phycologia* 61: 473–483.

Kim, K.M., Hwang, I.K., Park, J.K., and Boo, S.M. (2011a). A new agarophyte species, *Gelidium eucorneum* sp. nov. (Gelidiales, Rhodophyta), based on molecular and morphological data. *J. Phycol.* 47: 904–910.

Kim, K.M., Gerung, G.S., and Boo, S.M. (2011b). Two-gene sequences and morphology of *Gelidium zollingeri* (Kutzing) comb. nov. (Gelidiales, Rhodophyta). *Algae* 26: 33–40.

Kim, K.M., Hwang, I.K., Yoon, H.S., and Boo, S.M. (2012). Four novel *Gelidium* species (Gelidiales, Rhodophyta) discovered in Korea: *G. coreanum*, *G. jejuensis*, *G. minimum* and *G. prostratum*. *Phycologia* 51: 461–474.

Perrone, C., Bottalico, A., Boo, G.H., Boo, S.M., Miller, K.A., and Freshwater, D.W. (2019). *Gelidium adriaticum* sp. nov. and *Gelidium carolinianum* sp. nov. (Gelidiales, Rhodophyta) from the Mediterranean Sea. *Phycologia* 58: 359–373.

Rodriguez, D. (2020). *Gelidium gonzalezii* sp. nov. (Gelidiales, Rhodophyta) from the Mexican tropical Pacific based on molecular and morphological evidence. *Phytotaxa*459: 124–138.

Quiroz- González, N., Ponce-Marquez, M.E., Lopez-Gomez, N., and Rodriguez, D. (2021). Morphological and molecular characterization of two species of *Gelidium* (Gelidiales, Rhodophyta) from Mexico: *G. nayaritense* sp. nov. and the new record of *G. sanyaense*. *Phytotaxa*527: 161–176.

Wang, X., Xia, B., Bottalico, A., and Wang, G. (2017). Taxonomic revision of *Gelidium tsengii* and *Gelidium honghaiwanense* sp. nov. (Gelidiales, Rhodophyta) from China based upon molecular and morphological data analyses. *Chinese J. Oceanol. Limnol.* 35: 1442–1453.

Wang, X., Xia, B., Boo, G.H., and Wang, G. (2018). *Gelidium sanyaense* sp. nov. and *G. yangmeikengense* sp. nov. (Gelidiales, Rhodophyta) from southern China based on morphology and molecular data. *Phycologia* 57: 41–51.
